# Supplementary material for: Drinking Molecular Hydrogen Water Is Beneficial to Cardiovascular Function in Diet-Induced Obesity Mice
Source: MDPI journal article supplement (doi:10.3390/biology10050364), 2021-04-23
Supplement: s1 [file s1]

# Drinking Molecular Hydrogen Water is Beneficial to Cardiovascular Function in Diet-Induced Obesity Mice

Haruchika Masuda <sup>1,\*</sup>, Atsuko Sato <sup>1</sup>, Kumiko Miyata <sup>1</sup>, Tomoko Shizuno <sup>1</sup>, Akira Oyamada <sup>2</sup>, Kazuo Ishiwata <sup>1</sup>, Yoshihiro Nakagawa <sup>3</sup> and Takayuki Asahara <sup>2</sup>

## Supplemental Material

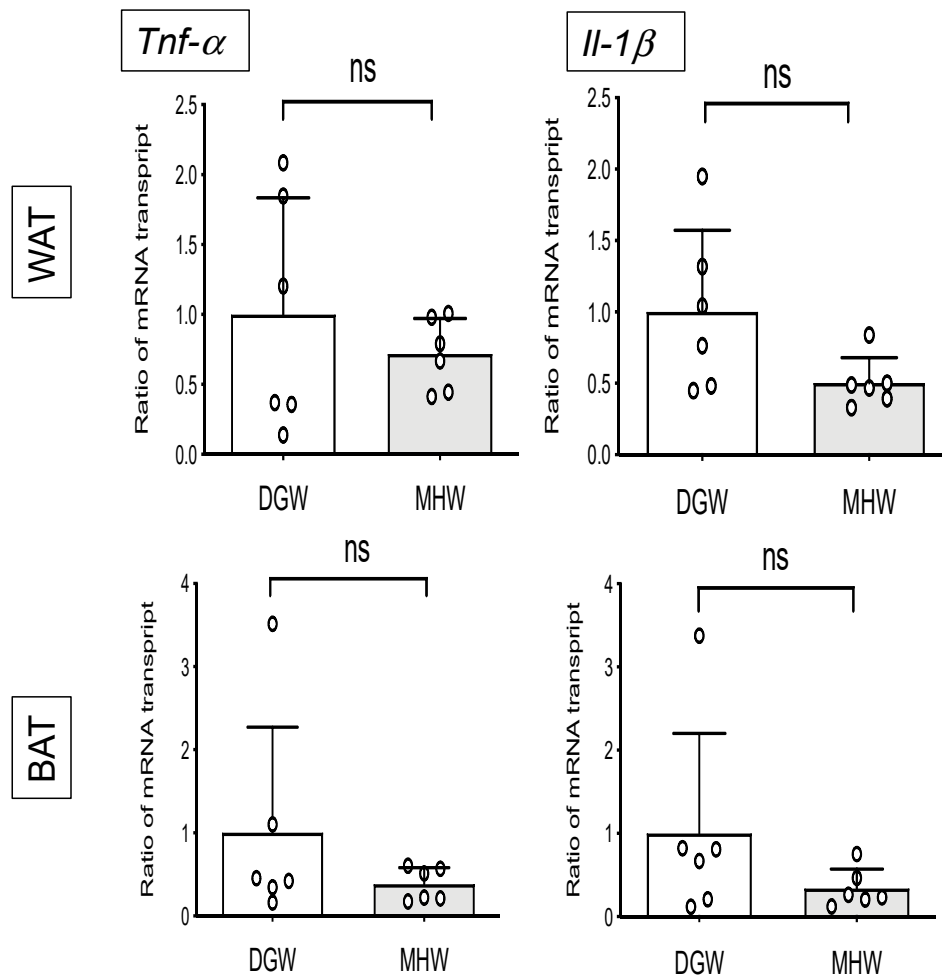

Supplemental Fig. 1

**Supplemental Fig. 1. The genes expressing in BAT of DIO mice drinking MHW vs DGW for 2weeks.**

Y axis indicates the transcriptional ratio of expressing genes (*iNos*, *Tnf-α* or *Il-1β*) in WAT or BAT of DIO mice drinking MHW, compared to DGW. The bar graphs show mean ± SD.

**Supplemental Table 1. The list of Taqman PCR probes for quantitative RT-PCR analysis.**

| Gene          | Cat. No.      | Co.                |
|---------------|---------------|--------------------|
| <i>iNos</i>   | Mm00440502_m1 | Applied Biosystems |
| <i>eNos</i>   | Mm00435217_m1 | Applied Biosystems |
| <i>Vegf</i>   | Mm01281449_m1 | Applied Biosystems |
| <i>Ucp-1</i>  | Mm01244861_m1 | Applied Biosystems |
| <i>Tnf-α</i>  | Mm00443260_g1 | Applied Biosystems |
| <i>Il-1β</i>  | Mm00434228_m1 | Applied Biosystems |
| <i>18SrNa</i> | Mm03928990_g1 | Applied Biosystems |

**Supplemental Table 2. pH values of DGW or MHW.**

|    | pre DGW    | post DGW   | pre MHW    | post MHW   |
|----|------------|------------|------------|------------|
| pH | 8.1 ± 0.04 | 8.3 ± 0.44 | 8.9 ± 0.93 | 9.6 ± 0.96 |

n= 4 per group.

**Supplemental Table 3. The changes of BW and PPBS in DIO mice drinking DGW or MHW for 14 days.**

|     | BW (g)     |             |               | PPBS (mg/dL) |              |               |
|-----|------------|-------------|---------------|--------------|--------------|---------------|
|     | day 0      | day 7       | day 14        | day 0        | day 7        | day 14        |
| DGW | 29.1 ± 2.0 | 31.0 ± 2.3* | 32.7 ± 2.4*** | 272.4 ± 57.5 | 246.6 ± 37.4 | 267.3 ± 46.3  |
| MHW | 30.3 ± 1.6 | 32.3 ± 1.5* | 33.7 ± 1.6*** | 279.3 ± 46.3 | 260.7 ± 48.5 | 232.8 ± 45.6* |

Asterisks indicate the statistical significance of the values at each time point versus day 0 in either of DGW or MHW.

\* $P < 0.05$ , \*\*\* $P < 0.001$ . n= 12.

**Supplemental Table 4. The comparison of 8-OHdG+/8-OHdG- cells in WAT between MHW and DGW drinking DIO mice.**

|                               | DGW         | MHW        | <i>P</i> value |
|-------------------------------|-------------|------------|----------------|
| 8-OHdG+ cells/mm <sup>2</sup> | 43.5 ± 10.5 | 17.4 ± 6.6 | 0.0159*        |
| 8-OHdG- cells/mm <sup>2</sup> | 3.75 ± 2.5  | 11.6 ± 3.4 | 0.0238*        |
| Total cells/mm <sup>2</sup>   | 47.3 ± 8.4  | 29.0 ± 8.6 | 0.0317*        |

*P* values with asterisks indicate the statistical significance of MHW versus DGW analysed by Mann-Whitney test. \* $P < 0.05$ . n= 4.

**Supplemental Table 5. The ratios of genes expressing in adipose tissues in BAT or WAT of DIO mice drinking MHW or DGW.**

|              | WAT        |             |                | BAT        |             |                |
|--------------|------------|-------------|----------------|------------|-------------|----------------|
| <i>Gene</i>  | DGW        | MHW         | <i>P</i> value | DGW        | MHW         | <i>P</i> value |
| <i>iNos</i>  | 1.0 ± 0.70 | 1.31 ± 0.54 | 0.3939         | 1.0 ± 0.82 | 1.64 ± 0.89 | 0.1255         |
| <i>eNos</i>  | 1.0 ± 0.21 | 1.98 ± 0.95 | 0.0411*        | 1.0 ± 0.16 | 1.64 ± 0.15 | 0.0022*        |
| <i>Vegf</i>  | 1.0 ± 0.38 | 1.29 ± 0.26 | 0.132          | 1.0 ± 0.28 | 1.57 ± 0.42 | 0.026*         |
| <i>Ucp-1</i> | 1.0 ± 1.02 | 1.47 ± 1.62 | 0.8857         | 1.0 ± 0.51 | 1.63 ± 0.30 | 0.0317*        |
| <i>Tnf-α</i> | 1.0 ± 0.84 | 0.72 ± 0.26 | >0.9999        | 1.0 ± 1.27 | 0.38 ± 0.20 | 0.6753         |
| <i>Il-1β</i> | 1.0 ± 0.57 | 0.50 ± 0.18 | 0.132          | 1.0 ± 1.20 | 0.34 ± 0.23 | 0.3095         |

*P* values with asterisks indicate the statistical significance of MHW versus DGW analysed by Mann-Whitney test.

**Supplemental Table 6. The comparison of 8-OHdG+/8-OHdG- cells in heart between MHW and DGW drinking DIO mice.**

|                               | DGW          | MHW         | <i>P</i> value |
|-------------------------------|--------------|-------------|----------------|
| 8-OHdG+ cells/mm <sup>2</sup> | 3,021 ± 1280 | 1,977 ± 361 | 0.1143         |
| 8-OHdG- cells/mm <sup>2</sup> | 124 ± 119    | 620 ± 307   | 0.0286*        |
| Total cells/mm <sup>2</sup>   | 3,145 ± 1220 | 2,597 ± 652 | 0.6885         |

*P* values with asterisks indicate the statistical significance of MHW versus DGW analysed by Mann-Whitney test. \* $P < 0.05$ . n= 4.

**Supplemental Table 7. The cardiac function evaluated by echocardiography in DIO mice drinking MHW or DGW.**

|                   | DGW         | MHW         | <i>P</i> value |
|-------------------|-------------|-------------|----------------|
| HR                | 237 ± 55    | 252 ± 11    | 0.6857         |
| LV mass/BW (mg/g) | 4.57 ± 0.20 | 3.64 ± 0.54 | 0.0286*        |
| FS (%)            | 22.8 ± 2.53 | 40.1 ± 5.54 | 0.0286*        |
| EF (%)            | 75.3 ± 4.4  | 90.3 ± 4.1  | 0.0286*        |

Italic *P* values with asterisks indicate the statistical significance of MHW versus DGW analysed by Mann-Whitney test.

**Supplemental Table 8. The counts of EPC-CFUs in DIO mice drinking MHW or DGW.**

|                                 | DGW         | MHW         | <i>P</i> value    |
|---------------------------------|-------------|-------------|-------------------|
| PEPC-CFUs/mL blood              | 10.6 ± 9.1  | 21.0 ± 10.2 | <i>0.0303</i> *   |
| DEPC-CFUs/mL blood              | 4.2 ± 5.2   | 16.9 ± 8.2  | <i>0.0317</i> *   |
| Total EPC-CFUs/mL blood         | 14.8 ± 14.2 | 37.0 ± 16.7 | <i>0.0281</i> *   |
| PEPC-CFUs/500 BM-KSL cells      | 31.7 ± 3.0  | 33.4 ± 4.0  | 0.6162            |
| DEPC-CFUs/500 BM-KSL cells      | 9.0 ± 2.8   | 12.8 ± 2.4  | <i>0.0038</i> **  |
| Total EPC-CFUs/500 BM-KSL cells | 40.7 ± 3.6  | 46.3 ± 1.5  | <i>0.0097</i> **  |
| SEPC-CFUs/Limb                  | 1583 ± 566  | 2011 ± 329  | <i>0.0422</i> *   |
| DEPC-CFUs/Limb                  | 443 ± 190   | 778 ± 193   | <i>0.0009</i> *** |
| Total EPC-CFUs/Limb             | 2026 ± 684  | 2790 ± 466  | <i>0.0111</i> *   |

Italic *P* values with asterisks indicate the statistical significance of MHW versus DGW analysed by Mann-Whitney test.
